# Supplementary material for: Engineered aldolases catalyzing stereoselective aldol reactions between aryl-substituted ketones and aldehydes
Source: Royal Society of Chemistry journal article supplement (doi:10.1039/d3cy00181d), 2023-01-01
Supplement: d3cy00181d1.pdf [file d3cy00181d1.pdf]

## Supporting Information

# Engineered Aldolases Catalyzing Stereoselective Aldol Reactions Between Aryl-Substituted Ketones and Aldehydes

Eugenia Chukwu Cornelius,† Michael Bartl,† Louise J Persson, Ruisheng Xiong, Daniela Cederfelt, Farshid Mashayekhy Rad, Thomas Norberg, Sarah Engel, Erik G Marklund, Doreen Dobritzsch and Mikael Widersten\*

Department of Chemistry – BMC, Uppsala University, Box 576, SE-751 23 Uppsala, Sweden

\*Corresponding author: mikael.widersten@kemi.uu.se; † These authors contributed equally to the work.

### Index

|                                                                                                                                                  |     |
|--------------------------------------------------------------------------------------------------------------------------------------------------|-----|
| <b>Experimental Details</b> .....                                                                                                                | S2  |
| <b>Supporting Tables</b> .....                                                                                                                   | S6  |
| <i>Table S1. Formation of aldol 6 – integrated peak areas</i> .....                                                                              | S6  |
| <i>Table S2. Formation of aldol 9a – integrated peak areas and catalyzed reaction rates</i> .....                                                | S7  |
| <i>Table S3. Steady state kinetic parameters of VGGC<sub>107</sub>C<sub>163</sub> catalyzed formation of 9a</i> .....                            | S9  |
| <i>Table S4. Sequences of deoxyoligonucleotides used in gene library construction</i> .....                                                      | S9  |
| <i>Table S5. ESI-MS/MS parameters for target analytes</i> .....                                                                                  | S9  |
| <i>Table S6. Data collection and refinement statistics FSA VG</i> .....                                                                          | S10 |
| <i>Table S7. Distances between the sulfurs of C107 and C163 in the VGGC<sub>107</sub>C<sub>163</sub> variant</i> .....                           | S10 |
| <b>Supporting Figures</b> .....                                                                                                                  | S11 |
| <i>Chart S1. Compounds studied</i> .....                                                                                                         | S11 |
| <i>Figure S1. Crystal structure of the FSA VG variant</i> .....                                                                                  | S11 |
| <i>Figure S2. Production of aldol 6 in the presence of selected VGGX<sub>107</sub>X<sub>163</sub> variants</i> .....                             | S12 |
| <i>Figure S3. Chiral separation of aldols and reaction mixtures</i> .....                                                                        | S12 |
| <i>Figure S4. Production of aldol 8 of selected aldolase variants</i> .....                                                                      | S13 |
| <i>Figure S5. Production of aldol 7 of selected aldolase variants</i> .....                                                                      | S13 |
| <i>Figure S6. Frequency of water being present</i> .....                                                                                         | S13 |
| <i>Figure S7. <sup>1</sup>H-NMR of 9a</i> .....                                                                                                  | S14 |
| <i>Figure S8. Analysis of distillation-purified phenylacetaldehyde</i> .....                                                                     | S14 |
| <i>Figure S9. Stepwise assembly of gene fragments</i> .....                                                                                      | S15 |
| <i>Figure S10. SDS-PAGE of purified FSA VGGX<sub>107</sub>X<sub>163</sub> variants</i> .....                                                     | S15 |
| <i>Figure S11. Steady state saturation curves of 9a formation and standard curve for 6 and 9a quantification</i> .....                           | S16 |
| <i>Figure S12. ESI MS/MS product ions of aldols 7 and 9a-9d</i> .....                                                                            | S17 |
| <i>Figure S13. Parameterization compounds</i> .....                                                                                              | S18 |
| <i>Figure S14. Number of structures per cluster</i> .....                                                                                        | S18 |
| <i>Figure S15. Comparison of modeled structures of (R)- and (S)-carbinolamine in the active site of VGGGC<sub>107</sub>C<sub>163</sub></i> ..... | S19 |
| <b>Supporting References</b> .....                                                                                                               | S19 |

## Experimental Details

**Chemicals and Reagents.** Compounds **1–5a** (Chart S1) were purchased from Aldrich (#138185, #R277614, #D107204, #A10701 and #107295, respectively). Phenylacetaldehyde (**5a**) was re-distilled prior to use (Sigma-Aldrich #107295-100, Sigma batch # MKBN8351V, our batch number: 135-009-0, amount: approximately 10 mL) was distilled under oil pump vacuum (1 mbar), bath temperature 55–85 °C. Two fractions were collected: Fraction 1, bp <31 °C (135-009-1, 0.3 g), Fr 2, bp 31–40 °C (135-009-2, 2.6 g). The fractions were analyzed by TLC (Silica gel 60 F254, toluene-ethyl acetate 9:1, UV detection) and <sup>1</sup>H-NMR. As can be seen from the TLC analysis (Figure S8A), the starting material was >50% degraded (slower migrating spots), but both the distillate fractions appeared to be reasonably pure. The difference between the starting material and the distilled fractions was also evident from the different viscosities. The starting material was a colorless, rather viscous liquid (even at room temperature), whereas both the distilled fractions (also colorless) had a more water-like viscosity. The <sup>1</sup>H-NMR analysis of the starting material (135-009-0) showed signals from phenylacetaldehyde but also from many other compounds, probably polymers self-condensation products and/or oxidation products. The main distillate fraction (135-009-2) appeared to be reasonably pure, with dominant signals from phenylacetaldehyde (purity 97 % by <sup>1</sup>H-NMR) (Figure S1B). Fractions 1 and 2 were stored refrigerated under nitrogen. <sup>1</sup>H-NMR spectra were recorded on Varian 400 MHz instruments. Chemical shifts (ppm) are reported referenced to the internal signal of residual protic solvent.

The synthesis of substituted phenylacetaldehydes (**5b–d**) and aldols **6** and **9a–b** has been described earlier.<sup>51,52</sup> Custom synthesized deoxyoligonucleotides were purchased from Thermo Fisher Scientific GmbH (Ulm, Germany). Protein extraction reagent (B-PER), DNA polymerases, restriction endonucleases and other molecular biology reagents were purchased from Thermo Fisher Scientific unless otherwise stated.

**Construction of Library of FSA Variants.** The GeneArt Site-Directed Mutagenesis PLUS Kit was used with a pair of mutagenesis primers to generate an A129G mutation, using the gene of an R134V/S166G mutant of FSA created earlier,<sup>53</sup> herein referred to as the VG mutant, as DNA template. This 'VGG' gene was subsequently applied as template to generate a gene library containing unbiased saturation mutagenesis<sup>54</sup> at codons L107 and

L163. The mutated genes were step-wise assembled by overlapping PCR reactions (Figure S9). Deoxyoligonucleotide sequences are given in Table S4.

**Protein Production.** A plasmid encoding for (His)<sub>5</sub>-tagged FSA-VGG or the mixture of plasmids encoding for C-terminally (His)<sub>5</sub>-tagged FSA-VGGX<sub>107</sub>X<sub>163</sub> were transformed in parallel into *Escherichia coli* strain BL21-AI (Thermo Fisher Scientific) [pREP4-GroEL-ES].<sup>55</sup> The bacteria were plated on LB-plates (LB: 10 g/l tryptone, 5 g/l yeast extract and 10 g/l NaCl) supplemented with 100 µg/mL ampicillin and 50 µg/mL kanamycin, and grown overnight at 37 °C. Resulting plates with transformants were stored at 8 °C until further use. Randomly picked transformant colonies were picked for overnight cultures in 2TY medium (2TY: 16 g/l tryptone, 10 g/l yeast extract and 5 g/l NaCl) supplemented with 100 µg/mL ampicillin and 30 µg/mL kanamycin. These overnight cultures were used for the inoculation of 100 mL of 2TY medium with 50 µg/mL ampicillin and 15 µg/mL kanamycin, aiming for an initial OD<sub>600</sub> of 0.05. As OD<sub>600</sub> reached ~0.8, the cultures were induced by addition of L-arabinose and isopropyl β-D-thiogalactoside to final concentrations of 0.04 % (w/v) and 0.5 mM, respectively. Following overnight incubation (30 °C, 220 rpm), the cells were harvested (6,000 g, 20 min, 4 °C) and the resulting bacterial pellets were stored at -80 °C awaiting further processing.

The cell pellets were resuspended in 10 mL lysis buffer (20 mM bicine, 500 mM NaCl, 20 mM imidazole, 0.1 mg/mL lysozyme, 10 µg/mL DNaseI, EDTA-free protease inhibitor, pH 8.35) and lysed using ultrasonication (5 min, 15 s on/off, 70 % amplitude). Insoluble components were separated by centrifugation (16,000 g, 60 min, 4 °C). The supernatant was subsequently incubated with 1 mL pre-equilibrated Ni<sup>2+</sup>-IMAC-resin overnight at 8 °C while shaking. The resin was washed with 20 mL washing buffer (40 mM bicine, 500 mM NaCl, 40 mM imidazole, pH 8.35), and His-tagged aldolase was eluted with 3×1.5 mL elution buffer (40 mM bicine, 500 mM NaCl, 500 mM imidazole, pH 8.35). 2.5 mL of the combined protein-containing fractions were desalted using pre-packed Sephadex G-25 (PD-10) columns, pre-equilibrated with desalting buffer (60 mM bicine, pH 8.35). Potentially formed precipitates in the elution fractions were removed by centrifugation (3,000 g, 30 min, 4 °C), before applying them to the PD-10 columns. See Figure S10 for SDS-PAGE separation following purification of a selection of isolated variants.

Protein concentration was obtained from intrinsic protein absorbance at 280 nm with the use of theoretical absorption coefficients, as provided by the ProtParam service (<https://www.expasy.org/resources/protparam>), VGGX<sub>107</sub>X<sub>163</sub>, 13,075 M<sup>-1</sup>cm<sup>-1</sup>, VGGX<sub>107</sub>Y<sub>163</sub>, 14,565 M<sup>-1</sup>cm<sup>-1</sup> or VGGX<sub>107</sub>W<sub>163</sub>, 18,575 M<sup>-1</sup>cm<sup>-1</sup>. If no protein was obtained after expression and purification, the possible existence of inclusion bodies or the lack of a His-tag due to a frame-shift mutation was established following SDS-PAGE stained with Coomassie Brilliant Blue R-250.

**Sequencing of Aldolase Genes.** Aliquots of overnight cultures were used for DNA preparation using the GeneJET Plasmid Miniprep Kit. DNA sequencing services were provided by Eurofins. Forward and reverse primer for the plasmid were used independently and the obtained sequences were aligned. In case of unclear sequencing results, the samples were interpreted to be contaminated and they were not used for further analysis.

**Screening for Aldolase Activity in Enzyme Library.** Samples were set up in 58.5 mM bicine, pH 8.35 with 2.5 % (v/v) acetonitrile by addition of 10 μM (2 nmol) purified aldolase, 5 mM of **5a** and 20 mM ketone **1** or **4**, respectively, in a total volume of 200 μl. The reaction mixtures were shaken in the dark at 30 °C for 22 h. The reactions were terminated by the addition of methanol to a final concentration of 50 % (v/v). Protein was removed by centrifugation (17,000 g, 30 min).

The supernatant was analyzed by reversed phase HPLC over an Ascentis C-18, (25×0.46 cm, 5 μm bead size) column using Shimadzu Providence system equipped with a LC-20AD pump. The solvent system consisted of methanol and 50 mM sodium phosphate, pH 3.0. Samples (20 μl) were injected with a SIL-20A autosampler and eluted with a gradient of 40–90 % methanol over 50 min at a flow rate of 0.5 mL/min. Eluted components were detected at 212 nm or 244 nm using an SPD-M20A diode array detector. Reference compounds (**6** and *syn*- or *anti*-**9a** and **9b**) were included to establish relevant chromatographic retention times and also allowed for direct analysis of the ratios of the diastereomers of **9a–d**. Identification of the product peaks of **8** was achieved from the similar elution profile to that of **9a** together with the characteristic UV absorbance maximum of the phenone moiety at ~244 nm. Obtained product amounts were determined from the correlation of HPLC peak areas of different standardized amounts of **9a** with 1 mM benzylalcohol as internal standard (Figure S11C). Quantification of aldol **6** was similarly performed after

calibration against a standard curve of peak area @212 nm versus amounts of **6** (Figure S11D).

Blank reactions (without added aldolase) were treated identically, and the corresponding aldol peak area was subtracted from sample peak areas of the same HPLC run. For multiple runs the mean of individual samples was formed. Errors were estimated to be the quotient of standard deviation and mean of multiple runs of an example reaction or the standards, respectively. The addition of blank- and sample-error resulted in the total error. A total error of 12.8 % was estimated for reactions in the presence of **3** as ketone substrate, based on the typical errors of other reactions. Diastereomeric ratios were provided as quotients of the peak integrals of the *syn*- and *anti*-diastereomer.

**Possible Catalytic Contributions From Buffer Components.** The use of sodium phosphate buffer instead of bicine, both at pH 8.35, showed a similar product formation (1.31×10<sup>6</sup> mA×min for the phosphate buffer, 1.41×10<sup>6</sup> mA×min for the bicine-system) with similar ratios of formed *syn*- and *anti* diastereomers (*anti:syn*=1:3.2 and 1:3.4, respectively). This suggests that bicine, although containing a tertiary amine that could potentially contribute electrophilic catalysis via hydrogen bonding, is not affecting the diastereomeric ratio or amount of product formation.

**Steady State Kinetics.** Initial reaction velocities were determined in the presence of either 20 mM **4** and varying concentrations (0.4–4 mM) of aldehyde **5a** and in the presence of 5 μM FSA VGGC<sub>107</sub>C<sub>163</sub>, or in the presence of 10 mM **5a** and varied concentrations (1–12 mM) of **4**, in the presence of 10 μM FSA VGGC<sub>107</sub>C<sub>163</sub>, at 30 °C and in 40 mM bicine, pH 8.35. Reactions were set up in triplicates with aliquots removed at three time points and the reactions were stopped by mixing with 1 volume of methanol (containing 2 mM benzylalcohol as internal standard). The samples were centrifuged at 17,000 g for 30 min. Cleared reaction mixtures were subsequently separated by reversed phase HPLC, as described above. Product peaks of formed **9a** were integrated and normalized to the internal standard. Product amounts were calculated from calibration against a standard curve. (Figure S11C) Initial velocities were determined from linear regression of the three time points. Kinetic parameters were estimated following non-linear regression of the aldehyde concentration dependencies of the initial velocities fitting the Michaelis-Menten equation using program MMFIT in the SIMFIT package ([www.simfit.org.uk](http://www.simfit.org.uk)) (Figures S11A and B).

**Synthetic Reactions.** (a) Synthesis of 7: Reactions were set up in 40 mM of bicine, pH 8.35 with 2.5 % (v/v) acetonitrile by addition 12 mM of **5a**, 18 mM of **2** and 24  $\mu\text{M}$  (0.26  $\mu\text{mol}$ ) of aldolase (VGGC<sub>107</sub>C<sub>163</sub>) in a total volume of 11 mL. (b) Synthesis of 9a–9d: Reactions were set up in 58.5 mM of bicine, pH 8.35 with 2.5 % (v/v) acetonitrile by addition 10 mM (10  $\mu\text{mol}$ ) of each phenylacetaldehyde derivative (**5a–d**), 10 mM (10  $\mu\text{mol}$ ) ketone (**3** or **4**, respectively) and 200  $\mu\text{M}$  (0.2  $\mu\text{mol}$ ) of aldolase (VGGC<sub>107</sub>V<sub>163</sub> in the reactions with **3**, VGGC<sub>107</sub>C<sub>163</sub> in the reactions with **4**) in a total volume of 1 mL.

Reactions were stirred in the dark at room temperature for 23 h. Reactions were stopped by the addition of methanol to a final concentration of 50 % (v/v) and protein was removed by centrifugation (17,000 *g*, 30 min) and filtration through a PVDF filter (cutoff 0.45  $\mu\text{m}$ ). The solvent was evaporated *in vacuo* at 50 °C, and the residual was dissolved in ethyl acetate or methanol.

Dissolved **9a** was filtered and concentrated under reduced pressure. The obtained white solid was purified by preparative TLC (CH<sub>2</sub>Cl<sub>2</sub>/MeOH: 100/2, R<sub>f</sub>: 0.17) to give a white solid (0.9 mg, non-optimized yield: 35 %).

**Product Analysis.** Aldol products **9a–d** were purified by reversed phase HPLC and molecular masses and fractionation patterns were determined by LC-MS tandem mass spectrometry. A 15  $\mu\text{l}$  aliquot of each analyte was separately injected and pumped to mass spectrometer on 1200 series HPLC (Agilent technologies, Santa Clara, CA, US) with a 200  $\mu\text{l}/\text{min}$  isocratic flow rate of mobile phase, composed of water/acetonitrile 50/50. The fragmentations of analytes were achieved using a 6410 Triple-Quad mass spectrometer (Agilent technologies) equipped with an electrospray ionization interface (ESI) working in negative polarity mode. MS/MS acquisitions were performed in Product ion scan mode with the deprotonated molecule  $[\text{M}-\text{H}]^-$ . The ESI parameters, detailed collision energies (CE) and scanned mass range are presented in Table S5 and product ions are shown in Figure S12. Obtained data were processed and illustrated by MassHunter workstation (Data Acquisition and Qualitative) software packages (Agilent).

**9a** was further analyzed by <sup>1</sup>H-NMR (Figure S7). The <sup>1</sup>H-NMR spectrum of **9a** was compared with previously published data on the same compound.<sup>52,56</sup>

Stereoconfigurations were analyzed by chromatography and <sup>1</sup>H-NMR: diastereomeric ratios *anti:syn* were determined from the integrated peak areas following reversed phase chromatography after parallel runs of reference compounds.<sup>52</sup> For compound **9a** the

diastereomer ratios were also estimated from the H2-H3 integrals extracted from the <sup>1</sup>H-NMR spectrum. Enantiomeric ratios of aldols **9a–d** were determined from the integrated areas of assigned product peaks following chiral HPLC (Chiralpak AS-H) with a mobile phase of 25:75 2-propanol:*n*-hexane (Figure S3). Peak assignments were based on comparisons with reference compounds synthesized and characterized previously.<sup>52</sup>

**Protein Crystallization, Data Collection and Structure Refinement.** The VG variant of FSA was crystallized by hanging drop vapor diffusion at 20 °C (293 K) (Figure S1). The drop consisted of 1  $\mu\text{l}$  protein solution (11.3 mg/mL in 30 mM Tris-HCl pH 8.0, 12 % (v/v) glycerol) and 1  $\mu\text{l}$  reservoir solution, and was equilibrated against 1 mL of the reservoir solution comprised of 1.7 M (NH<sub>4</sub>)<sub>2</sub>SO<sub>4</sub>, 0.1 M bicine pH 8.75, and 150 mM NaCl. Crystallization was enhanced by introducing microcrystals of FSA VG into the drop by streak seeding. Co-crystallization with hydroxyacetone (compound **1**) yielded crystals from a drop comprised of 1.1  $\mu\text{l}$  protein-ketone solution (10.2 mg/mL in 30 mM Tris-HCl pH 8.0, 10.8 % glycerol (v/v) and 20 mM ketone **1**) and 0.9  $\mu\text{l}$  reservoir solution containing 1.8 M (NH<sub>4</sub>)<sub>2</sub>SO<sub>4</sub>, 0.1 M bicine pH 8.75, 150 mM NaCl, streak-seeded with microcrystals of FSA VG and equilibrated against 1 mL of the reservoir solution. Crystals were flash frozen in liquid nitrogen and prior to X-ray diffraction analysis at the ESRF (Grenoble, France), beamline ID29.

Crystallographic data was automatically processed on site.<sup>57</sup> The structure of the FSA VG variant was solved by molecular replacement using PHASER<sup>58</sup> with the wild-type FSA subunit structure (pdb ID: 1L6W<sup>59</sup>) as search model. Manual model building, addition of water molecules and ligand building was performed with COOT<sup>510</sup>, and alternated with restrained refinement using REFMAC5 until R-factors converged.<sup>511</sup> A set of randomly selected reflections (~5 %) was set aside to monitor R<sub>free</sub>. The final model contains 15 FSA VG subunits, each containing a covalent adduct of ketone **1** and glyceraldehyde with K85, and 177 water molecules. The structure has been deposited in the Protein Data Bank with the ID 7QXF. Data collection and refinement statistics are given in Table S6.

**Parametrization of the Carbinolamine.** GAFF parameters were produced for the carbinolamine, using acpype.<sup>513</sup> The initial parameterization was done separately for the side chain, where the peptide backbone had been replaced with a methyl group, in an ideal geometry (Figure S13A). We opted for empirical

BCC charges because for biomolecular simulations they have proven to be of similar quality to the more demanding RESP-derived charges.<sup>514</sup> The resulting topology was then merged with the parameters for lysine from the Amber ff99SB-ILDN,<sup>515</sup> where lysine parameters were used for the backbone and the proximal part of the side chain up to and including the C<sub>β</sub> atom (Figure S13B). In order to achieve a charge-neutral species, the charge of the two hydrogens attached to the C<sub>γ</sub> atom were each reduced by 0.0175 *e*, accounting for minor differences in the charge distribution along the molecule/residue in the original force field and the GAFF parameters. Bonded parameters for interactions spanning the “joint” between the lysine and carbinol intermediate parts were taken from the original lysine parameters if at least half of the atoms involved were originally lysine atoms, otherwise from the GAFF parameters. Since the joint connects two chemically similar parts of the aliphatic chains, we expect our choice of bridging parameters to have a negligible effect on the simulations. In order to enable 5-fs timesteps in the simulations we also used Mkvsites<sup>516</sup> to obtain angle constraints for the alcohols in the carbinolamine. Since no primary amines or alkyl groups using the GAFF atom types were present, no new virtual site parameters were needed.

All new parameters were merged into the Amber ff99SB-ILDN force field files, which were used for the subsequent simulations. The force field files are available for download (see Supplementary Data). Notably, because of the symmetry in the functional form of the parameters, the (*R*)- and (*S*)-enantiomer with respect to the stereocenter at the X atom will be determined by the conformation, hence the same parameters can be used regardless of enantiomer.

**Creating Structure Models.** Structures for molecular dynamics simulations were created with PyMOL 2.5.2.<sup>512</sup> The carbinolamine intermediate was created with the Builder tool, and other amino acid mutations were made with the Mutagenesis Wizard. The Sculpting Wizard was subsequently used to relieve strains in and around modified residues.

**Molecular Dynamics Simulations.** Molecular dynamics simulations were performed with the Gromacs simulation package, version 2021.3.<sup>517</sup> The decameric proteins were solvated in TIP3P water with 0.154 M NaCl, and modelled with the Amber ff99SB-ILDN force field<sup>518</sup> with parameters added for the carbinolamine intermediate. Equilibration was carried out in five steps, beginning with steepest-descent energy minimization, followed by a 100-ps *NVT* simulation with position restraints on the heavy atoms of the protein, a 1-ns *NVT* simulation without position restraints, a 1-ns *NPT* simulation employing the Berendsen barostat<sup>519</sup> set to 1 atm, and finally an *NVT* simulation of 10 ns. In the production simulations that followed, Parrinello-Rahman<sup>520</sup> was used for pressure coupling. All simulations had the temperature set to 300 K with the velocity rescaling thermostat by Bussi *et al.*<sup>521</sup> Hydrogens were simulated as virtual sites,<sup>522</sup> and the LINCS algorithm<sup>523</sup> with 6th order expansion was used to constrain the length of all bonds. The fast smooth Particle-Mesh Ewald method<sup>524</sup> with a 0.12-nm Fourier spacing was used to calculate the electrostatic interactions, and the cut-off for non-bonded interactions was set to 1.0 nm with the Verlet scheme. Each model was simulated for 200 ns with a 5-fs time step, and system sizes ranged between 216 000 and 235 000 atoms.

**Analyses of Simulation Trajectories.** Cluster analyses of the molecular dynamics trajectories were performed (Figure S14) with *gmx cluster* from the Gromacs simulation package, using the gromos clustering algorithm<sup>525</sup> with a 0.075-nm cut-off. The analyses considered the residues Q59, T109, Y131, and the carbinolamine together with K85, excluding hydrogen atoms. Only the final 100 ns of the simulations were included in the cluster analysis, which amounted to 1001 frames and hence 10010 structural conformations over the ten protein chains. Inter-atomic distances were measured with MDAnalysis 2.0.0.<sup>526</sup>

## Supporting Tables

**Table S1.** Formation of aldol **6** – integrated peak areas

| Codon |      | 6 Peak area |                  |         |
|-------|------|-------------|------------------|---------|
| L107  | L163 | sample code | @212 nm (mAxmin) | error   |
| A     | C    | average     | 5091730          | 981837  |
|       |      | B03         | 5231506          |         |
|       |      | D09         | 6974267          |         |
|       |      | F12         | 3069417          |         |
| A     | C    | T185N       | 434538           | 86908   |
| A     | D    | F11         | 741060           | 142899  |
| A     | E    | average     | 1993713          | 384447  |
|       |      | C06         | 1163360          |         |
|       |      | D05         | 2824066          |         |
| A     | G    | average     | 53464            | 10310   |
|       |      | A03 03.26.  | 10662            |         |
|       |      | C05 04.09.  | -42312           |         |
|       |      | D12         | -401281          |         |
|       |      | G03         | 197742           |         |
|       |      | G11         | 502511           |         |
| A     | I    | A10         | 11548927         | 2226978 |
| A     | K    | average     | 3465399          | 668232  |
|       |      | E15         | 27895212         |         |
|       |      | F03         | 4141277          |         |
| A     | L    | A11         | 12557549         | 2421470 |
| A     | M    | A08         | 11163998         | 2152752 |
| A     | S    | D13         | 1359839          | 262218  |
| A     | V    | average     | 9303299          | 1793954 |
|       |      | B14         | 10556056         |         |
|       |      | F04         | 8050542          |         |
| A     | W    | F15         | 827228           | 159514  |
| A     | Y    | F07         | 1608354          | 310139  |
| C     | A    | C04         | 5541986          | 1068660 |
| C     | C    | average     | 5987343          | 1154538 |
|       |      | C11         | 8090846          |         |
|       |      | F08         | 3883840          |         |
| C     | D    | C14         | 691651           | 133371  |
| C     | E    | F10         | 5333355          | 1028430 |
| C     | G    | average     | -14380           | -2773   |
|       |      | E05         | 522114           |         |
|       |      | G02         | -550875          |         |
| C     | R    | B10         | -657349          | -126757 |
| C     | V    | average     | 9166422          | 1767560 |
|       |      | E02         | 9210056          |         |
|       |      | G07         | 9122789          |         |
| C     | W    | B02         | -64131           | -12366  |
| D     | D    | E06         | -63876           | -12317  |

| Codon | sample code | 6 Peak area | error |
|-------|-------------|-------------|-------|
|-------|-------------|-------------|-------|

| 107 | 163 | @212 nm (mAxmin) |           |          |
|-----|-----|------------------|-----------|----------|
| E   | E   | F05              | 713079    | 137503   |
| F   | C   | average          | 10978257  | 2116936  |
|     |     | F14              | 11435845  |          |
|     |     | G05              | 10520670  |          |
| F   | E   | D02              | 390113    | 75225    |
| F   | G   | G09              | 10853087  | 2092799  |
| F   | V   | average          | 9149457   | 1764288  |
|     |     | D04              | 11162208  |          |
|     |     | D06              | 9975714   |          |
|     |     | E11              | 8383068   |          |
|     |     | G14              | 7076839   |          |
| G   | C   | G12              | 6758743   | 1303287  |
| G   | G   | B11              | 1268701   | 244643   |
| G   | K   | E13              | 3732150   | 719670   |
| H   | L   | D03              | 10132643  | 1953876  |
| L   | L   | average          | 10201738  | 1967199  |
|     |     | D01              | 11287551  |          |
|     |     | E01              | 9275848   |          |
|     |     | F01              | 10041815  |          |
| M   | G   | average          | 11234151  | 2166279  |
|     |     | D08              | 11057952  |          |
|     |     | D10              | 11410349  |          |
| M   | K   | F13              | 10182974  | 1963581  |
| N   | C   | C03              | 9754808   | 1881018  |
| Q   | G   | C10              | 11409686  | 2200128  |
| S   | G   | E08              | 480478    | 92650    |
| S   | W   | B08              | 3293307   | 635048   |
| V   | C   | average          | 7711102   | 1486930  |
|     |     | G06              | 6314118   |          |
|     |     | G13              | 9108086   |          |
| V   | G   | E14              | -68831    | -13273   |
| V   | V   | A05              | 11693900  | 2254932  |
| V   | V   | P187Q            | 1120157   | 224103   |
| V   | W   | average          | -389013   | -75013   |
|     |     | C09              | -680946   |          |
|     |     | D15              | -97081    |          |
| W   | C   | E10              | 1224297   | 236081   |
| W   | G   | G01              | 10450170  | 2015104  |
| W   | I   | F06              | 3280541.0 | 632586.2 |
| W   | M   | C12              | -561963   | -108363  |
| Y   | G   | E07              | 9818764   | 1893351  |
| Y   | M   | B04              | 6870124   | 1324765  |
| Y   | Q   | B07              | 7162028   | 1381053  |

**Table S2.** Formation of aldol **9a** – integrated peak Areas and catalyzed reaction rates

| Codon |      |             | <i>anti-9a</i>             |        |                                      |       | <i>syn-9a</i>              |         |                         |       | dr <b>9a</b><br><i>anti:syn</i> =<br>1:x |
|-------|------|-------------|----------------------------|--------|--------------------------------------|-------|----------------------------|---------|-------------------------|-------|------------------------------------------|
| L107  | L163 | sample code | Peak area @244 nm (mA×min) | error  | rate (h <sup>-1</sup> ) <sup>a</sup> | error | Peak area @244 nm (mA×min) | error   | rate (h <sup>-1</sup> ) | error |                                          |
| A     | C    | average     | 142650                     | 18066  | 0.11                                 | 0.01  | 988577                     | 127063  | 0.74                    | 0.1   | 6.9                                      |
|       |      | B03         | 139605                     |        |                                      |       | 1376805                    |         |                         |       |                                          |
|       |      | D09         | 131870                     |        |                                      |       | 571570                     |         |                         |       |                                          |
|       |      | F12         | 156476                     |        |                                      |       | 1017356                    |         |                         |       |                                          |
| A     | C    | T185N       | 35979                      | 4605   | 0.027                                | 0.003 | 168167                     | 21525   | 0.13                    | 0.02  | 4.7                                      |
| A     | D    | F11         | 72385                      | 9167   | 0.054                                | 0.007 | 248163                     | 31897   | 0.19                    | 0.02  | 3.4                                      |
| A     | E    | average     | 80252                      | 10164  | 0.060                                | 0.008 | 22957                      | 2951    | 0.017                   | 0.002 | 0.3                                      |
|       |      | C06         | 31035                      |        |                                      |       | 99971                      |         |                         |       |                                          |
|       |      | D05         | 129469                     |        |                                      |       | -54057                     |         |                         |       |                                          |
| A     | G    | average     | 27061                      | 3427   | 0.020                                | 0.003 | 25705                      | 3304    | 0.019                   | 0.002 | 0.9                                      |
|       |      | A03 03.26.  | 29681                      |        |                                      |       | 82369                      |         |                         |       |                                          |
|       |      | C05 04.09.  | 42416                      |        |                                      |       | 105762                     |         |                         |       |                                          |
|       |      | D12         | 6019                       |        |                                      |       | -72015                     |         |                         |       |                                          |
|       |      | G03         | 9716                       |        |                                      |       | -45550                     |         |                         |       |                                          |
|       |      | G11         | 47474                      |        |                                      |       | 57959                      |         |                         |       |                                          |
| A     | I    | A10         | 117020                     | 14820  | 0.088                                | 0.01  | 899273                     | 115584  | 0.67                    | 0.09  | 7.7                                      |
| A     | K    | average     | 65980                      | 8356   | 0.050                                | 0.006 | 278403                     | 35783   | 0.21                    | 0.03  | 4.2                                      |
|       |      | E15         | 52031                      |        |                                      |       | 211461                     |         |                         |       |                                          |
|       |      | F03         | 79929                      |        |                                      |       | 345346                     |         |                         |       |                                          |
| A     | L    | A11         | 105662                     | 13382  | 0.079                                | 0.01  | 656514                     | 84382   | 0.49                    | 0.06  | 6.2                                      |
| A     | M    | A08         | 96466                      | 12217  | 0.072                                | 0.009 | 596568                     | 76677   | 0.45                    | 0.06  | 6.2                                      |
| A     | S    | D13         | -266236                    | -33718 | 0                                    | 0     | -805541                    | -103537 | 0                       | 0     | n.d.                                     |
| A     | V    | average     | 109733                     | 13897  | 0.082                                | 0.01  | 568230                     | 73035   | 0.43                    | 0.02  | 5.2                                      |
|       |      | B14         | 125198                     |        |                                      |       | 624208                     |         |                         |       |                                          |
|       |      | F04         | 94269                      |        |                                      |       | 512253                     |         |                         |       |                                          |
| A     | W    | F15         | 100792                     | 12765  | 0.076                                | 0.01  | 314198                     | 40384   | 0.24                    | 0.03  | 3.1                                      |
| A     | Y    | F07         | 123824                     | 15682  | 0.093                                | 0.01  | 483650                     | 62164   | 0.36                    | 0.05  | 3.9                                      |
| C     | A    | C04         | -44955                     | -5693  | 0                                    | 0     | 73663                      | 9468    | 0.055                   | 0.007 | n.d.                                     |
| C     | C    | average     | 103414                     | 13097  | 0.078                                | 0.01  | 2381835                    | 306139  | 1.8                     | 0.2   | 23                                       |
|       |      | C11         | 75766                      |        |                                      |       | 3109238                    |         |                         |       |                                          |
|       |      | F08         | 131062                     |        |                                      |       | 1654433                    |         |                         |       |                                          |
| C     | D    | C14         | 44453                      | 5630   | 0.033                                | 0.004 | 219768                     | 28247   | 0.16                    | 0.02  | 4.9                                      |
| C     | E    | F10         | 98198                      | 12437  | 0.074                                | 0.009 | 448142                     | 57600   | 0.34                    | 0.04  | 4.6                                      |
| C     | G    | average     | 48763                      | 6176   | 0.037                                | 0.005 | 144659                     | 18593   | 0.11                    | 0.01  | 3.0                                      |
|       |      | E05         | 24942                      |        |                                      |       | 101005                     |         |                         |       |                                          |
|       |      | G02         | 72583                      |        |                                      |       | 188313                     |         |                         |       |                                          |
| C     | R    | B10         | 154882                     | 19615  | 0.12                                 | 0.01  | 529441                     | 68049   | 0.40                    | 0.05  | 3.4                                      |
| C     | V    | average     | 61679                      | 7811   | 0.046                                | 0.006 | 679292                     | 8731    | 0.51                    | 0.07  | 11                                       |
|       |      | E02         | 75273                      |        |                                      |       | 730181                     |         |                         |       |                                          |
|       |      | G07         | 48084                      |        |                                      |       | 628404                     |         |                         |       |                                          |
| C     | W    | B02         | 80661                      | 10216  | 0.061                                | 0.008 | 229949                     | 29556   | 0.17                    | 0.02  | 2.9                                      |
| D     | D    | E06         | -8945                      | -1133  | 0                                    | 0     | -23510                     | -3022   | 0                       | 0     | n.d.                                     |
| E     | E    | F05         | 96802                      | 12260  | 0.073                                | 0.009 | 400908                     | 51529   | 0.30                    | 0.04  | 4.1                                      |
| F     | C    | average     | 2652                       | 336    | 0.014                                | 0.002 | -82976                     | -10665  | 0                       | 0     | n.d.                                     |

|   |   |         |        |       |        |        |         |         |       |       |      |  |
|---|---|---------|--------|-------|--------|--------|---------|---------|-------|-------|------|--|
|   |   | F14     | -13510 |       |        |        |         | -139043 |       |       |      |  |
|   |   | G05     | 18814  |       |        |        |         | -26910  |       |       |      |  |
| F | E | D02     | 98252  | 12443 | 0.074  | 0.009  | -14766  | -1898   | 0     | 0     | n.d. |  |
| F | G | G09     | 177318 | 22457 | 0.13   | 0.02   | 87023   | 11185   | 0.065 | 0.008 | 0.5  |  |
| F | V | average | 18215  | 2307  | 0.014  | 0.002  | -225906 | -29036  | 0     | 0     | n.d. |  |
|   |   | D04     | -42855 |       |        |        |         | -521390 |       |       |      |  |
|   |   | D06     | 45129  |       |        |        |         | -444589 |       |       |      |  |
|   |   | E11     | 50444  |       |        |        |         | 119662  |       |       |      |  |
|   |   | G14     | 20143  |       |        |        |         | -57305  |       |       |      |  |
| G | C | G12     | 87201  | 11044 | 0.065  | 0.008  | 486919  | 62584   | 0.37  | 0.05  | 5.6  |  |
| G | G | B11     | 107067 | 13560 | 0.080  | 0.01   | 323887  | 41629   | 0.24  | 0.03  | 3.0  |  |
| G | K | E13     | 1229   | 156   | 0.0009 | 0.0001 | -49597  | -6375   | 0     | 0     | n.d. |  |
| H | L | D03     | 13829  | 1751  | 0.010  | 0.001  | -127704 | -16414  | 0     | 0     | n.d. |  |
| L | L | average | 38355  | 4858  | 0.029  | 0.004  | 177911  | 22867   | 0.13  | 0.02  | 4.6  |  |
|   |   | D01     | -15545 |       |        |        |         | -28886  |       |       |      |  |
|   |   | E01     | 37632  |       |        |        |         | 176365  |       |       |      |  |
|   |   | F01     | 92978  |       |        |        |         | 386255  |       |       |      |  |
| M | G | average | 154361 | 19549 | 0.12   | 0.01   | 84414   | 10850   | 0.063 | 0.008 | 0.5  |  |
|   |   | D08     | 145615 |       |        |        |         | 158544  |       |       |      |  |
|   |   | D10     | 163108 |       |        |        |         | 10285   |       |       |      |  |
| M | K | F13     | 81906  | 10373 | 0.061  | 0.008  | 283839  | 36482   | 0.21  | 0.03  | 3.5  |  |
| N | C | C03     | 28803  | 3648  | 0.022  | 0.003  | 888051  | 114142  | 0.67  | 0.09  | 31   |  |
| Q | G | C10     | 67788  | 8585  | 0.051  | 0.006  | 252109  | 32404   | 0.19  | 0.02  | 3.7  |  |
| S | G | E08     | 55859  | 7074  | 0.042  | 0.005  | 193175  | 24829   | 0.14  | 0.02  | 3.5  |  |
| S | W | B08     | 203864 | 25819 | 0.15   | 0.02   | 933934  | 120039  | 0.70  | 0.09  | 4.6  |  |
| V | C | average | 49161  | 6226  | 0.037  | 0.005  | 2800052 | 359893  | 2.1   | 0.3   | 57   |  |
|   |   | G06     | 60376  |       |        |        |         | 3234388 |       |       |      |  |
|   |   | G13     | 37946  |       |        |        |         | 2365716 |       |       |      |  |
| V | G | E14     | 266008 | 33689 | 0.20   | 0.03   | 202166  | 25984   | 0.15  | 0.02  | 0.8  |  |
| V | V | A05     | 9441   | 1196  | 0.0071 | 0.001  | 444171  | 57090   | 0.33  | 0.04  | 47   |  |
| V | V | P187Q   | 231007 | 29569 | 0.17   | 0.02   | 413808  | 52967   | 0.31  | 0.04  | 1.8  |  |
| V | W | average | 244838 | 31008 | 0.18   | 0.02   | 455937  | 58602   | 0.34  | 0.04  | 1.9  |  |
|   |   | C09     | 200485 |       |        |        |         | 710207  |       |       |      |  |
|   |   | D15     | 289190 |       |        |        |         | 201668  |       |       |      |  |
| W | C | E10     | 49642  | 6287  | 0.037  | 0.005  | 150329  | 19322   | 0.11  | 0.01  | 3.0  |  |
| W | G | G01     | -3795  | -481  | 0      | 0      | -79387  | -10204  | 0     | 0     | n.d. |  |
| W | I | F06     | 58109  | 7359  | 0.044  | 0.006  | 197020  | 25323   | 0.15  | 0.02  | 3.4  |  |
| W | M | C12     | 103352 | 13089 | 0.078  | 0.01   | 283889  | 36488   | 0.21  | 0.03  | 2.7  |  |
| Y | G | E07     | 4448   | 563   | 0.0033 | 0.0004 | 20322   | 2612    | 0.015 | 0.002 | 4.6  |  |
| Y | M | B04     | 282637 | 35795 | 0.21   | 0.03   | 455764  | 58580   | 0.34  | 0.04  | 1.6  |  |
| Y | Q | B07     | 229092 | 29014 | 0.17   | 0.02   | 817935  | 105130  | 0.61  | 0.08  | 3.6  |  |

<sup>a</sup> Reaction rates were calculated from  $\text{rate (h}^{-1}\text{)} = (\text{integrated product peak area}) / (605759 \times \text{reaction time} \times 0.1)$ , where 605759 is the peak area corresponding to 1 nmol of product (**Figure S11C**) and 0.1 is the amount of enzyme, in nmol, resulting in the obtained product peaks.



**Table S3.** Steady state kinetic parameters of the VGGC<sub>107</sub>C<sub>163</sub> catalyzed formation of **9a**

| Varied substrate       | $k_{cat}^{app}$ (min <sup>-1</sup> ) | $K_M$ (mM)                 | $k_{cat}/K_M^{app}$ (min <sup>-1</sup> ×M <sup>-1</sup> ) |
|------------------------|--------------------------------------|----------------------------|-----------------------------------------------------------|
| <b>5a</b> <sup>a</sup> | 0.021±0.004 (102±12) <sup>c</sup>    | 3.7±1 (2.7±1) <sup>c</sup> | 5.8±2                                                     |
| <b>4</b> <sup>b</sup>  | 0.067±0.008                          | 17±3                       | 4.2±0.3                                                   |

<sup>a</sup> Determined in the presence of 20 mM (1.2× $K_M$ ) **4** and varying concentrations of **5a**. <sup>b</sup> Determined in the presence of 10 mM (2.7× $K_M$ ) **5a** and varying concentrations of **4**. <sup>c</sup> Values in brackets refer to the FSA VGG catalyzed aldol reaction with saturating concentration of **1** and varied concentrations of **5a**. Data adapted from ref. S3. Fits of the Michaelis-Menten equation to the substrate concentration dependency of initial velocities are shown in Figures S11A and B.

**Table S4.** Sequences of deoxyoligonucleotides used in gene library construction

| Name                  | Sequence 5'→3'                                                          |
|-----------------------|-------------------------------------------------------------------------|
| A129G_Forward         | GCGCTGGCAGGTGCGGAATATGTTGGGCCTTACGTTAATGTTATTGATGCT                     |
| A129G mutamer 2       | CCCTGAGCATCAATAACATTAACGTAAGGCCCAACATATCCGCACCTGCCAGC                   |
| pUC_Forward           | CCCAGTCACGACGTTGTA AAAACG                                               |
| VGMut_107_Reverse     | CGTCGGAATCCCTTCCGC                                                      |
| VGMut_107_Forward_NDT | GCGGAAGGGATTCCGACG <b><u>NDT</u></b> GGAACCGCGGTATATGGCG <sup>a,b</sup> |
| VGMut_107_Forward_VMA | GCGGAAGGGATTCCGACG <b><u>VMA</u></b> GGAACCGCGGTATATGGCG                |
| VGMut_107_Forward_ATG | GCGGAAGGGATTCCGACG <b><u>ATG</u></b> GGAACCGCGGTATATGGCG                |
| VGMut_107_Forward_TGG | GCGGAAGGGATTCCGACG <b><u>TGG</u></b> GGAACCGCGGTATATGGCG                |
| VGMut_163_Reverse     | CACTTTCGCCTGCGGCG                                                       |
| VGMut_163_Forward_NDT | CGCCGCAGGCGAAAGTG <b><u>NDT</u></b> GCAGCGGGTTTCAA AACCC                |
| VGMut_163_Forward_VMA | CGCCGCAGGCGAAAGTG <b><u>VMA</u></b> GCAGCGGGTTTCAA AACCC                |
| VGMut_163_Forward_ATG | CGCCGCAGGCGAAAGTG <b><u>ATG</u></b> GCAGCGGGTTTCAA AACCC                |
| VGMut_163_Forward_TGG | CGCCGCAGGCGAAAGTG <b><u>TGG</u></b> GCAGCGGGTTTCAA AACCC                |
| pUC_Reverse           | AGCGGATAACAATTTACACAGG                                                  |

<sup>a</sup> Mutated positions are written in bold and underlined. <sup>b</sup> N = A/C/G/T; D = A/G/T; V = A/C/G; M = A/C.

**Table S5.** ESI-MS/MS parameters for target analytes

| Parameters                   | MS/MS setting for target analytes |                               |                     |        |               |
|------------------------------|-----------------------------------|-------------------------------|---------------------|--------|---------------|
|                              | Analytes (aldol)                  | Parent ion (M-H) <sup>-</sup> | Scanned range (m/z) | CE (V) |               |
| Polarity                     | Negative                          | <b>9a</b>                     | 255.2               | 50-260 | 5, 10, 15, 20 |
| Spray voltage (V)            | 3000                              | <b>9b</b>                     | 285.2               | 50-290 | 5, 10, 15     |
| Desolvation temperature (°C) | 350                               | <b>9c</b>                     | 285.2               | 50-290 | 5, 10         |
| Desolvation gas flow (l/min) | 10                                | <b>9d</b>                     | 315.1               | 50-320 | 5, 8          |
| Nebulizer gas (psi)          | 30                                | <b>7</b>                      | 207.1               | 50-210 | 5, 10, 15, 20 |
| Dwell time (ms)              | 200                               |                               |                     |        |               |

**Table S6.** Data collection and refinement statistics FSA R134V/S166G

| Data Collection                   |                                     | Refinement                                |        |
|-----------------------------------|-------------------------------------|-------------------------------------------|--------|
| Space group                       | C2                                  | No. of reflection in work set             | 107028 |
| $a, b, c$ (Å)                     | 182.2, 176.9, 120.1                 | No. of reflection in free set             | 5735   |
| $\alpha, \beta, \gamma$ (°)       | 90, 91.5, 90                        | $R_{work}$                                | 0.2195 |
| Molecules in a. u.                | 15                                  | $R_{free}$                                | 0.2621 |
| Wavelength (Å)                    | 1.0722                              | No. of non-hydrogen atoms                 |        |
| Resolution (Å)                    | 49.67-2.62 (2.71-2.62) <sup>a</sup> | Protein                                   | 24334  |
| Total reflections                 | 383607 (33915)                      | Solvent                                   | 177    |
| Unique reflections                | 112831 (10827)                      | Average B factor (Å <sup>2</sup> )        |        |
| Multiplicity                      | 3.4 (3.1)                           | All atoms                                 | 64.1   |
| Completeness (%)                  | 99.1 (96.8)                         | Solvent                                   | 40.8   |
| $\langle I/\sigma(I) \rangle$     | 7.2 (1.0)                           | r.m.s.d. bonds (Å)                        | 0.0074 |
| Wilson B factor (Å <sup>2</sup> ) | 64.3                                | r.m.s.d. angles (°)                       | 1.529  |
| $R_{merge}$                       | 0.121 (0.866)                       | Residues in Ramachandran plot regions (%) |        |
| $R_{meas}$                        | 0.144 (1.043)                       | favored                                   | 97.7   |
| $R_{pim}$                         | 0.077 (0.575)                       | allowed                                   | 2.3    |
| $CC_{1/2}$                        | 0.993 (0.650)                       | outliers                                  | 0.0    |
|                                   |                                     | PDB-ID                                    | 7QXF   |

<sup>a</sup> Values in parentheses are for the highest resolution shell.

**Table S7.** Distances between the sulfurs of C107 and C163 in the VGGC<sub>107</sub>C<sub>163</sub> variant, during 200-ns of molecular dynamics simulations

| Enantiomer | 0-200 ns    |             | 100-200 ns  |             |
|------------|-------------|-------------|-------------|-------------|
|            | Average (Å) | Minimum (Å) | Average (Å) | Minimum (Å) |
| (R)        | 5.76        | 3.29        | 5.68        | 3.34        |
| (S)        | 6.21        | 3.21        | 6.25        | 3.32        |

## Supporting Figures

Chart S1. Compounds studied

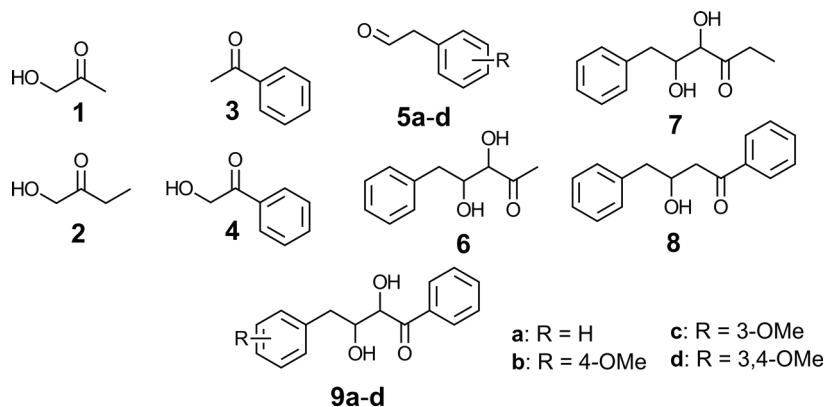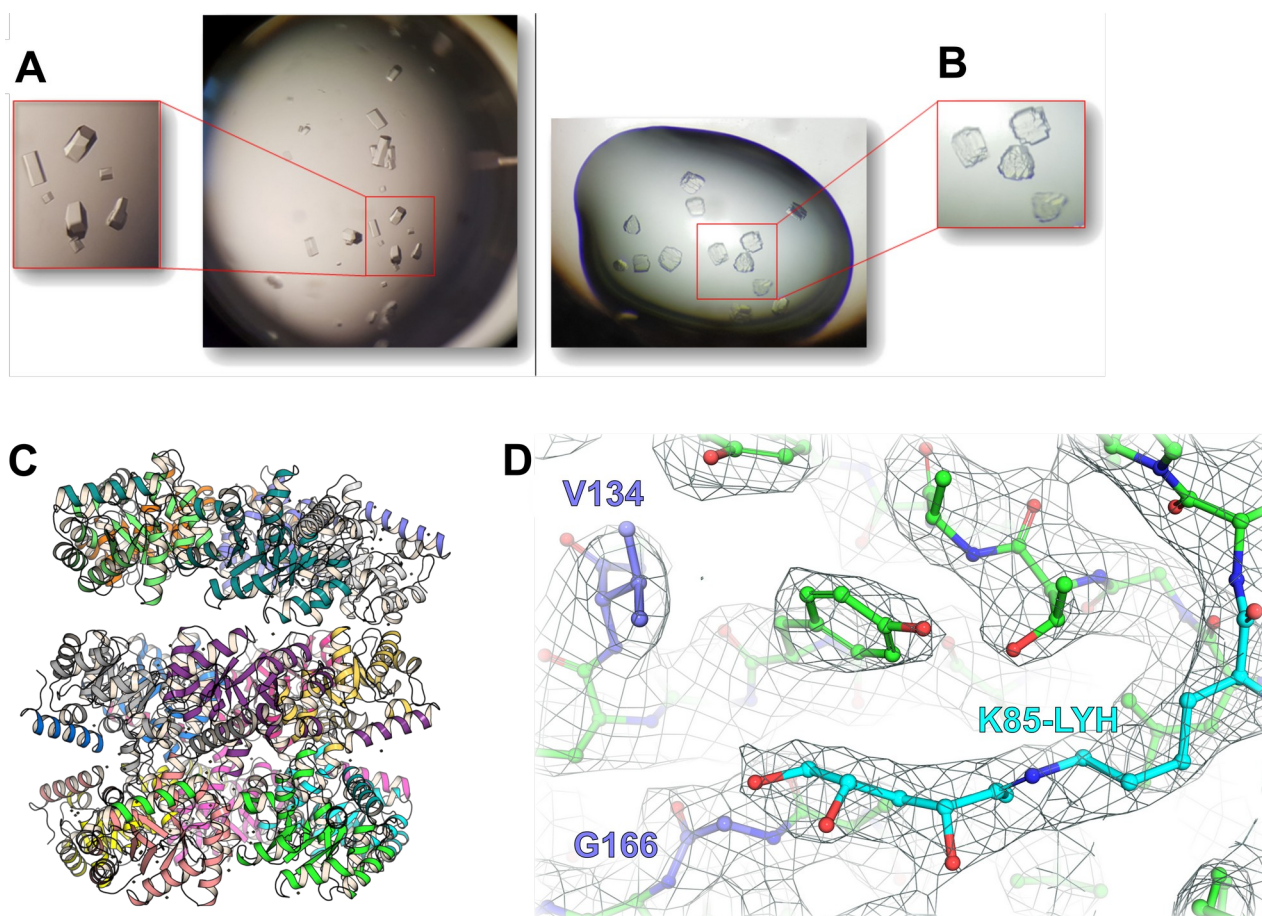

**Figure S1.** X-ray crystallography of the FSA VG variant. **(A)** and **(B)** Crystals of FSA VG obtained in absence **(A)** and presence of 20 mM **1** **(B)** upon seeding with FSA VG microcrystals. **(C)** Packing of the 15 subunits of the VG variant in the crystal asymmetric unit, forming one complete homodecamer as well as one pentameric ring of another that is assembled by crystallographic symmetry. Coloring is by subunit chain. **(D)** Close-up of the active site of VG, chain A. Clear electron density for a covalent adduct at K85 was observed and interpreted as belonging to the imine of (3*S*,5*R*,6)-tri-hydroxyhexan-2-one (LYH). This was based on the rationale that the protein had been co-crystallized with ketone **1** which reacted with K85. This original adduct reacted then further with glyceraldehyde formed from glycerol, which was abundant in the crystallization liquor. The mutated residues R134V and S166G are colored in purple. The  $2F_o - F_c$  map is contoured at  $1\sigma$ . Figures **C** and **D** were constructed in PyMol ver. 2.5<sup>S12</sup> from the atomic coordinates in PDB entry 7QXF.

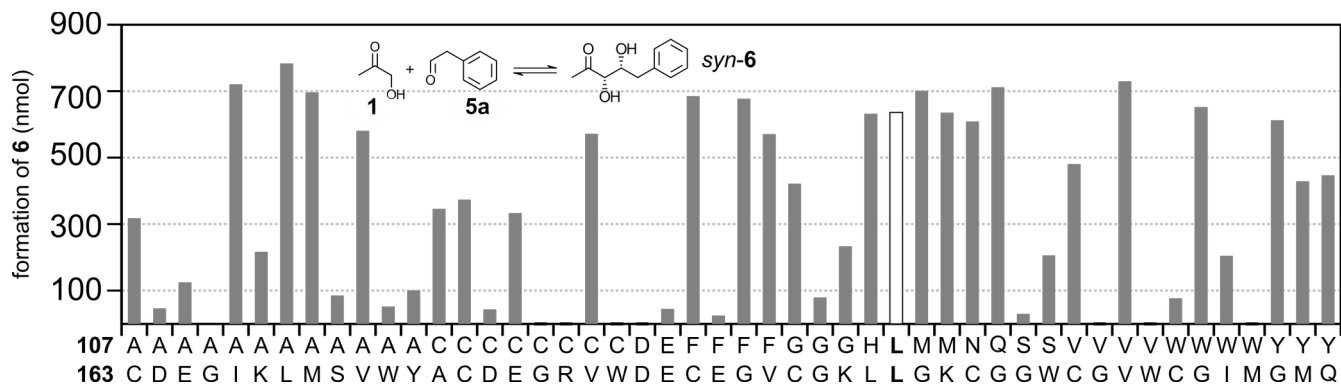

**Figure S2.** Formation of aldol **6** following 22 h reaction in the presence of 10  $\mu$ M (2 nmol) of the different FSA VGGX<sub>107</sub>X<sub>163</sub> variants. Bars represent integrated peak areas after reversed phase HPLC separation and calibration against a standard curve (Figure S11D). The value for the parent enzyme VGGL<sub>107</sub>L<sub>163</sub> is shown as a white bar. The standard deviation of the values are  $\pm 13$  %.

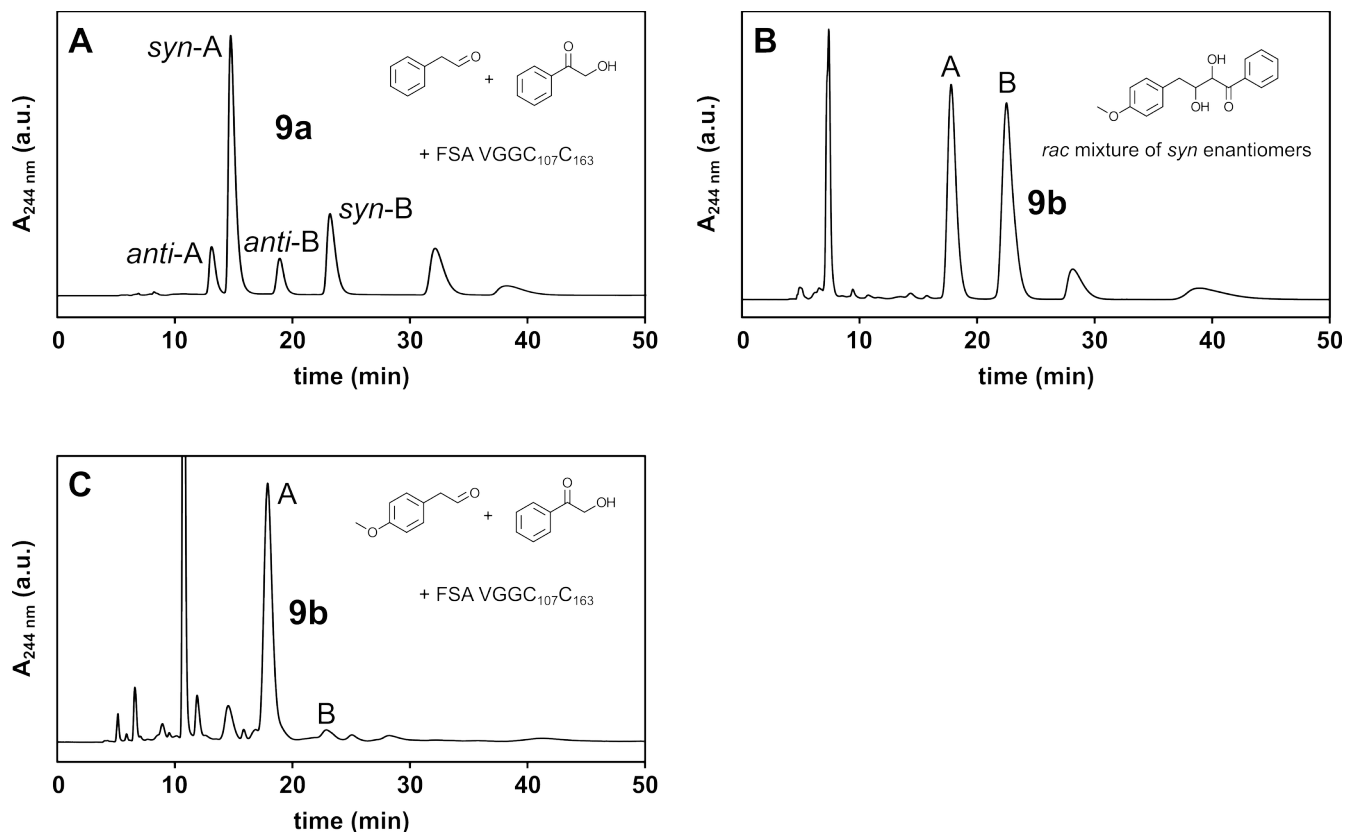

**Figure S3.** Chiral separation of aldols and FSA-containing reaction mixtures. Samples were chromatographed through a Chiralpak AS-H column with a mobile phase consisting of 25:75 2-propanol:*n*-hexane. (A) Product mixture after 23 h incubation of 40 mM (40  $\mu$ mol) **4** and 20 mM (20  $\mu$ mol) **5a** and 200  $\mu$ M (0.2  $\mu$ mol) VGGC<sub>107</sub>C<sub>163</sub> at 30 °C. The *syn* and *anti* diastereomers were purified by preparative TLC and subsequently analyzed by chiral HPLC for resolution of individual enantiomers. (B) Reference aldol, *syn* diastereomer of **9b** synthesized using SmI<sub>2</sub>.<sup>S2</sup> (C) Crude reaction mixture after 23 h incubation of 10 mM (10  $\mu$ mol) **4** and 10 mM (10  $\mu$ mol) **5b**, in the presence of 200  $\mu$ M (0.2  $\mu$ mol) FSA VGGC<sub>107</sub>C<sub>163</sub> at room temperature. Peak A in (C) fully agrees with Peak A in the racemic mixture of *syn*-**9b** in (B) regarding retention time in the chromatography as well as in  $\lambda_{\max}$ .

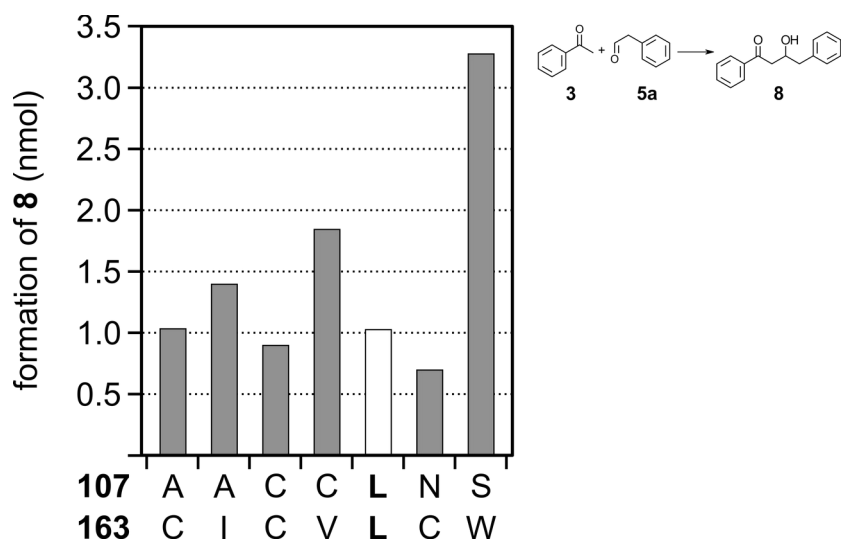

**Figure S4.** Formation of aldol **8** in the presence of 10  $\mu$ M (2 nmol) selected aldolase variants with acetophenone (**3**) as ketone donor. The parent enzyme VGGL<sub>107</sub>L<sub>163</sub> is shown as a white bar. The standard deviation of the values are  $\pm 13$  %.

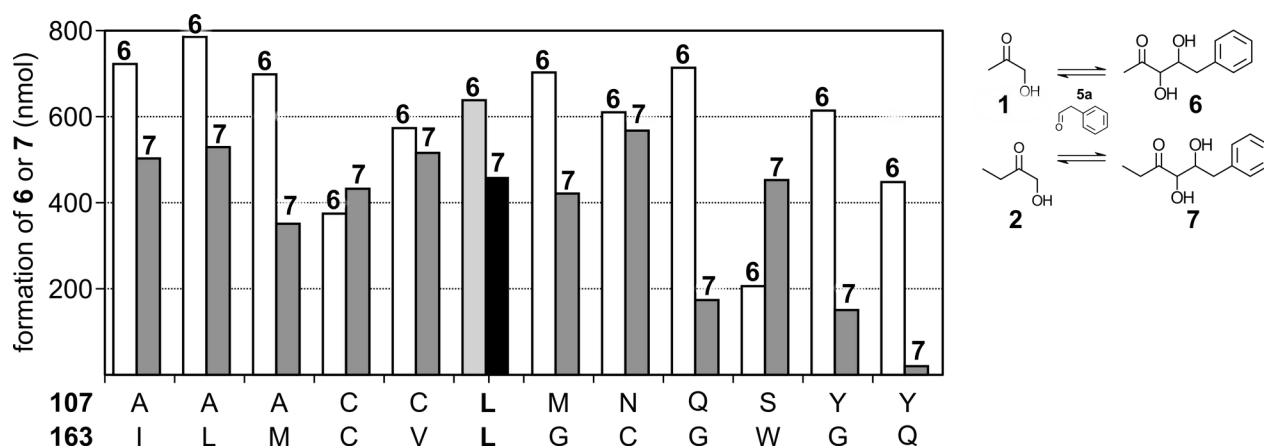

**Figure S5.** Formation of aldol **7** (gray bars) as ketone substrate of selected VGGX<sub>107</sub>X<sub>163</sub> variants, as compared to aldol **6** (white bars) from reactions with either **2** or **1**, respectively together with aldehyde **5a**. The VGGL<sub>107</sub>L<sub>163</sub> parent is included with light gray (**6**) or black (**7**) bars.

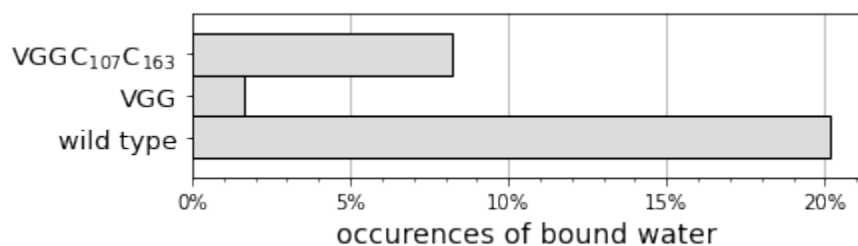

**Figure S6.** Frequency of water being present in a pocket defined as within 4 Å of the side-chain carbonyl oxygen of Q59, and the hydroxyl oxygens of Y131 and T109, during the final 100 ns of simulation.

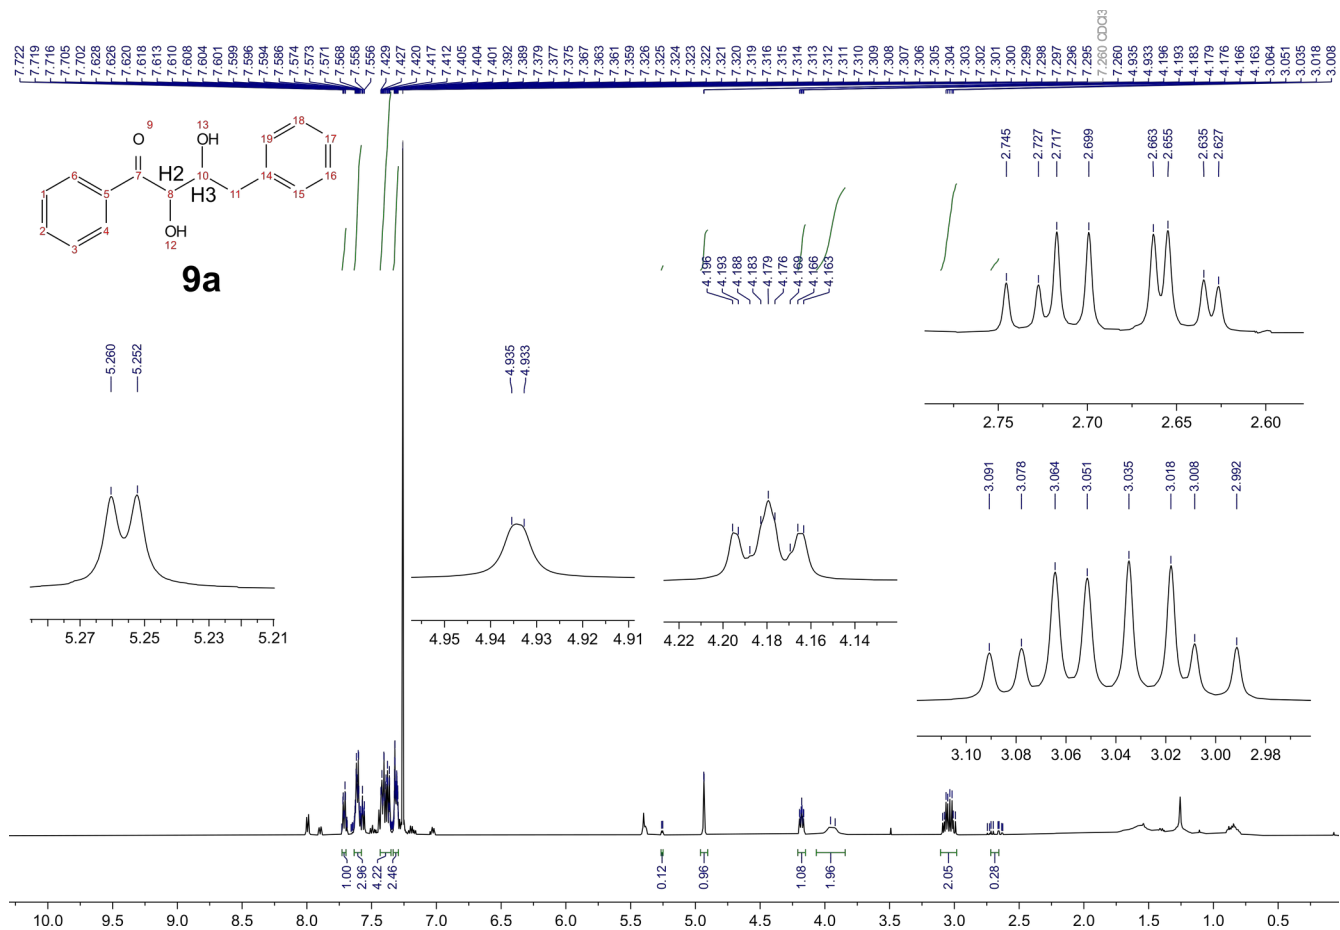

**Figure S7.**  $^1\text{H-NMR}$  (500 MHz,  $\text{CDCl}_3$ )  $\delta$  7.73-7.69 (m, f1H), 7.65-7.54 (m, 3H), 7.43-7.34 (m, 4H), 7.34-7.29 (m, 2H), 5.26 (d,  $J = 4.1$  Hz, 0.12H, *anti*-isomer), 4.93 (d,  $J = 1.3$  Hz, 1H), 4.18 (ddd,  $J = 8.0, 6.5, 1.3$  Hz, 1H), 4.05–3.85 (br, 2H, OH), 3.07, 3.01 (dABq,  $J = 6.5$  Hz,  $J_{AB} = 13.2$  Hz, 2H), 2.72, 2.65 (dABq,  $J = 9.0$  Hz,  $J = 4.1$  Hz,  $J_{AB} = 14.0$  Hz, 0.24H, *anti*-isomer). For clarity, only aliphatic protons of the *anti*-isomer are listed.

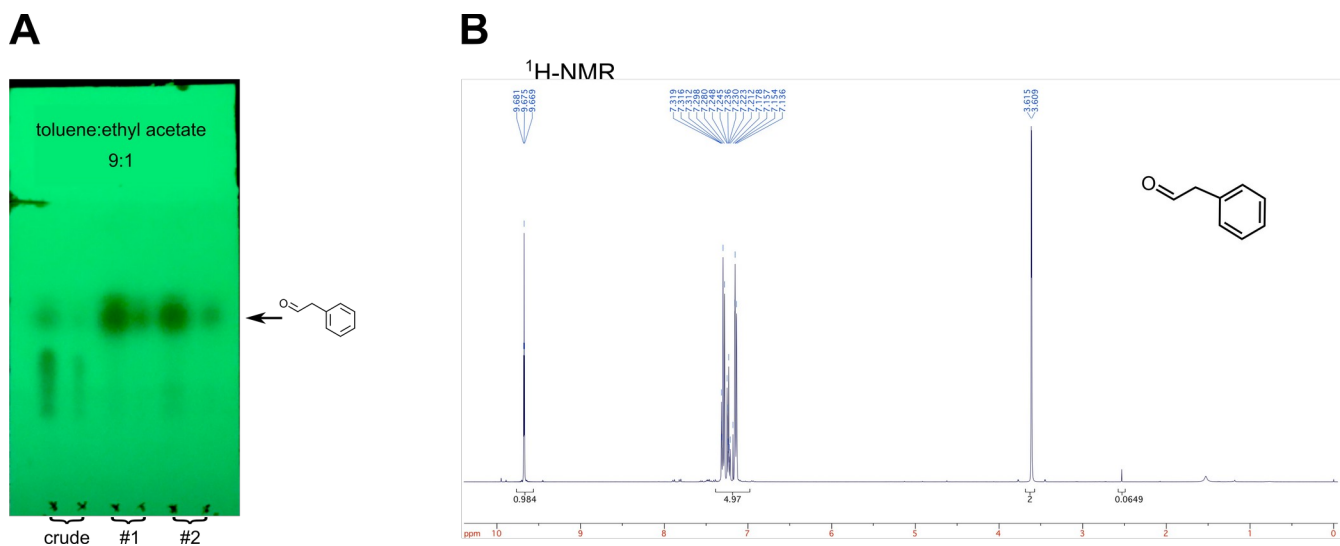

**Figure S8.** Analysis of distillation-purified phenyl acetaldehyde. (A) TLC, “crude”, starting material, “#1” and “#2”, purified fractions. (B)  $^1\text{H-NMR}$  of fraction #2.

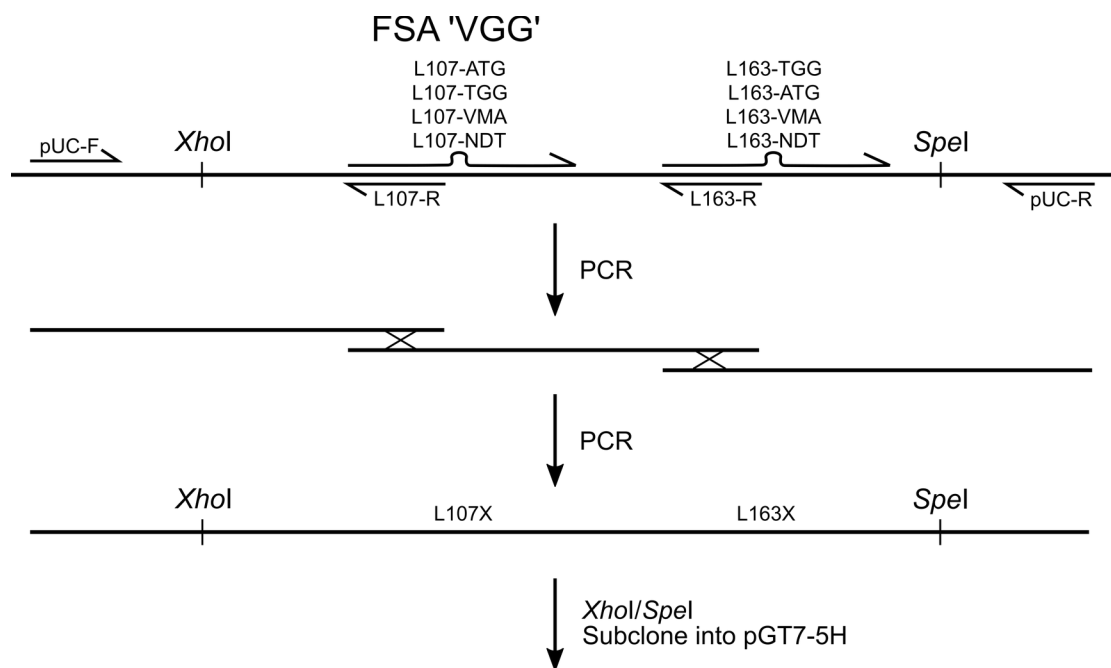

**Figure S9.** Scheme describing the stepwise assembly of PCR-generated gene fragments encoding the FSA VGG<sub>107</sub>X<sub>163</sub> enzyme library.

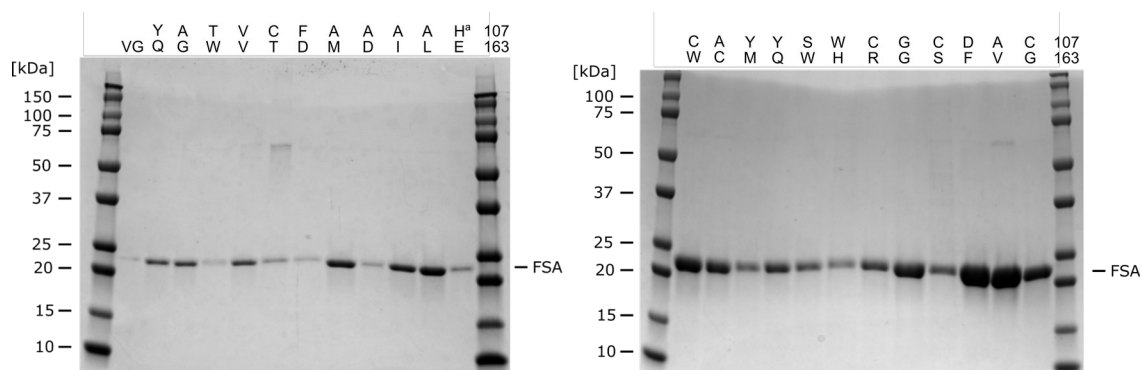

**Figure S10** SDS-PAGE of purified FSA VGG variants. Samples are desalted proteins following Ni-IMAC purification as described in the Experimental Details section.

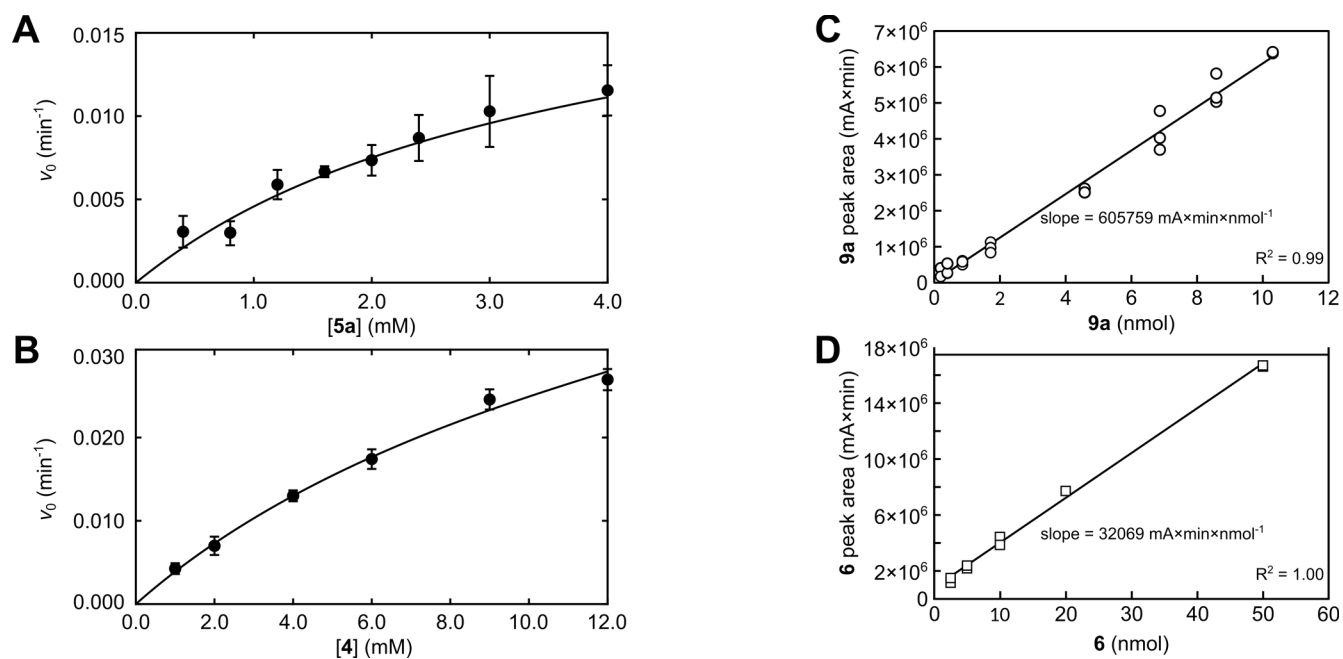

**Figure S11.** (A) and (B) Steady state reaction velocities of formation of **9a** in the presence of (A), 5  $\mu\text{M}$  FSA VGGC<sub>107</sub>C<sub>163</sub> and 20 mM **4**, and varying concentrations of **5a**, and (B), 10  $\mu\text{M}$  FSA VGGC<sub>107</sub>C<sub>163</sub> and 10 mM **5a** and varying concentrations of **4**. Error bars represent standard deviations of three parallel reactions. Solid lines represent non-linear regression fits of the Michaelis-Menten equation. See the Experimental sections for details. (C) Standard curve of peak areas following reversed phase HPLC of aldol **9a**. (D) Standard curve of peak areas following reversed phase HPLC of aldol **6**.



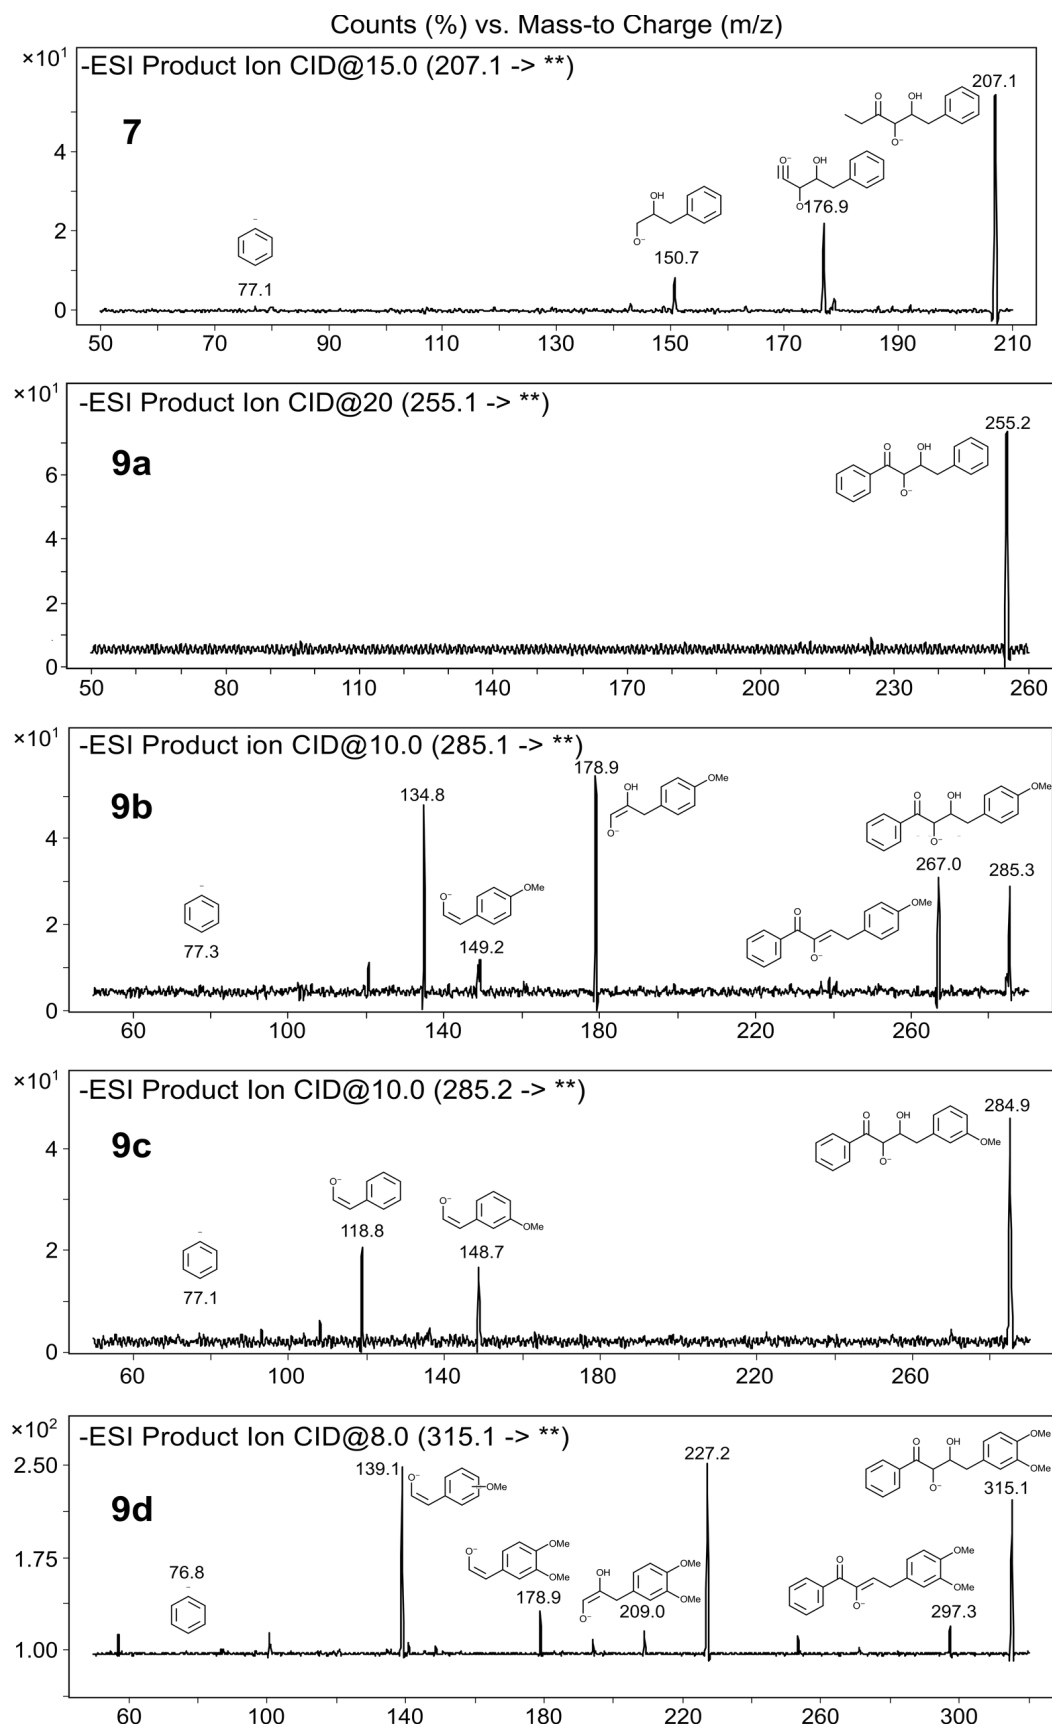

Figure S12. ESI MS/MS product ions of aldols **7** and **9a-9d**.

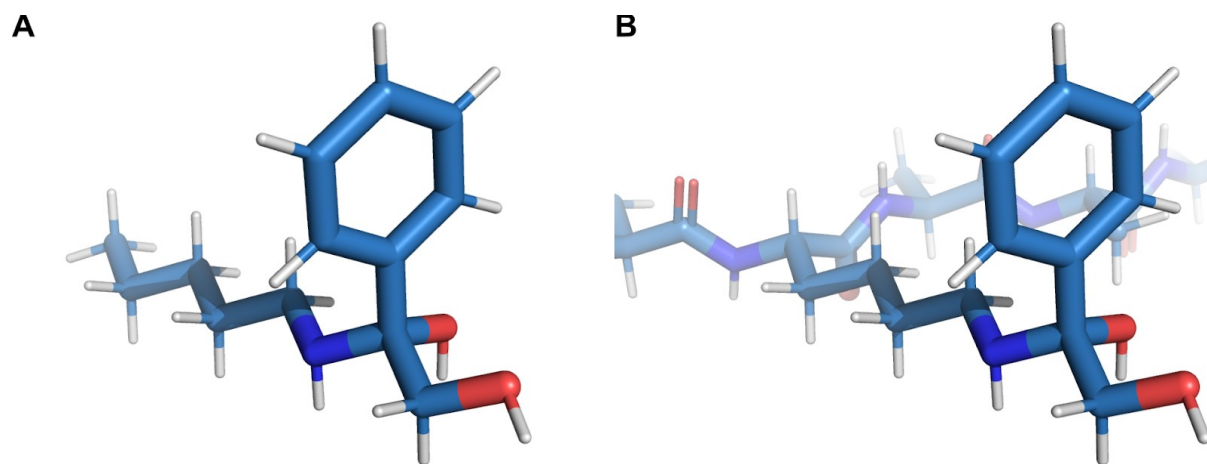

**Figure S13.** Parameterization compounds. **(A)** The molecule used for initial parameterization with ACPYPE. **(B)** Illustration of the complete carbinol intermediate incorporated into a peptide backbone.

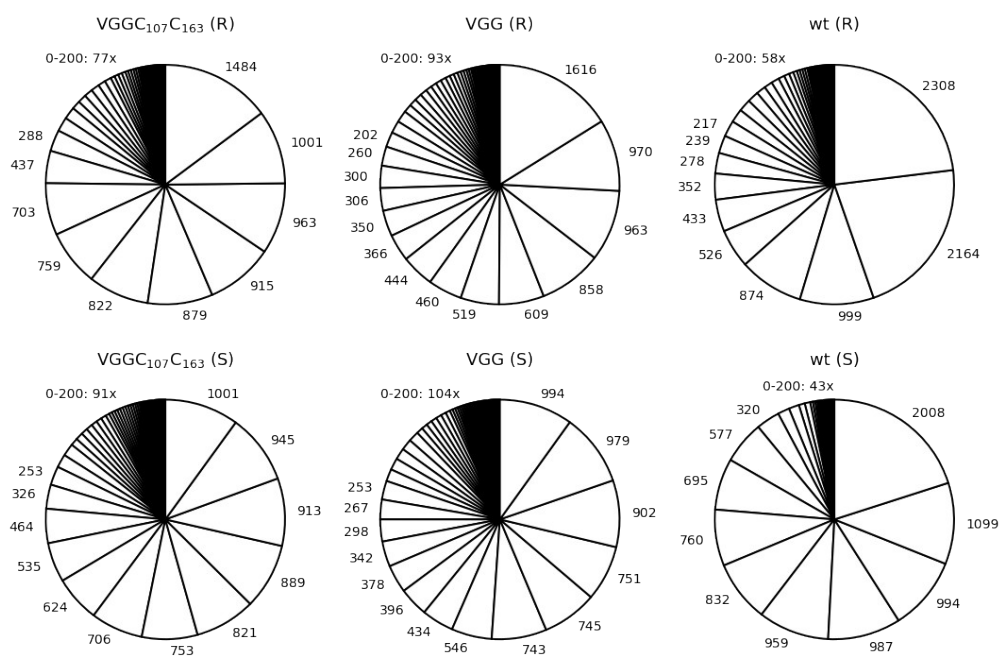

**Figure S14.** Number of structures per cluster that resulted from cluster analyses of the simulation trajectories.

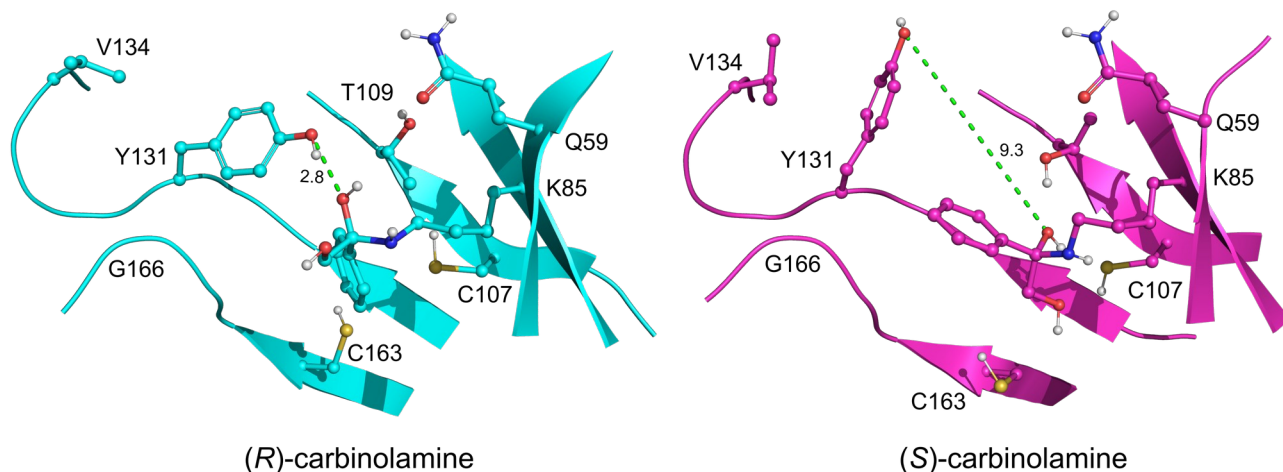

**Figure S15.** Comparison of the highest populated structure clusters following molecular dynamics simulations, modeling either the (*R*)-carbinolamine (left) or (*S*)-carbinolamine (right) formed after reaction between ketone **4** and the active-site K85. In the (*S*)-carbinolamine the leaving group hydroxyl is pointing away from the proposed catalytic acid Y131 and the phenyl substituent of the adduct is not occupying the cleft formed between cysteines 107 and 163.

## Supporting References

- S1 D. Al-Smadi, T. R. Enugala, T. Norberg, J. Kihlberg and M. Widersten, *Synlett* 2018, **29**, 1187-1190.
- S2 D. Al-Smadi, T. R. Enugala, V. Kessler, A. R. Mhasal, S. C. L. Kamerlin, J. Kihlberg, T. Norberg, and M. Widersten, *J. Org. Chem.* 2019, **84**, 6982-6991.
- S3 H. Ma, S. Engel, T. R. Enugala, D. Al-Smadi, C. Gautier and M.; Widersten, *Biochemistry* 2018, **57**, 5877-5885.
- S4 L. Tang, H. Gao, X. Zhu, X. Wang and M. Zhou, *BioTechniques* 2012, **52**, 149-157.
- S5 G. E. Dale, H.-J. Schönfeld, H. Langen and M. Stieger, *Prot. Engin.* 1994, **7**, 925-931.
- S6 N. Miyoshi, S. Takeuchi and Y. Ohgo, *Y. Chem. Lett.* 1993, 2129-2132.
- S7 S. Monaco, E. Gordon, M. W. Bowler, S. Delageniere, M. Guijarro, D. Spruce, O. Svensson, S. M. McSweeney, A. A. McCarthy, G. Leonard and M. H. Nanao, *J. Appl. Cryst.* 2013, **46**, 804-810.
- S8 A. J. McCoy, R. W. Grosse-Kunstleve, P. D. Adams, M. D. Winn, L. C. Storoni and R. J. Read, *J. Appl. Cryst.* 2007, **40**, 658-674.
- S9 S. Thorell, M. Schürmann, G. A. Sprenger and G. Schneider, *J. Mol. Biol.* 2002, **319**, 161-171.
- S10 P. Emsley, B. Lohkamp, W. G. Scott and K. Cowtan, *Acta Cryst.* 2010, **D66**, 486-501.
- S11 G. N. Murshudov, A. A. Vagin and E. J. Dodson, *Acta Cryst.* 1997, **D53**, 240-255.
- S12 The PyMOL Molecular Graphics System, Version 2.0 Schrödinger, LLC.
- S13 A. W. Sousa da Silva and W. F. Vranken, *BMC Res. Notes* 2012, **5**, 367.
- S14 K. Lindorff-Larsen, S. Piana, K. Palmo, P. Maragakis, J. L. Klepeis, R. O. Dror and D. E. Shaw, *Proteins* 2010, **78**, 1950-1958.
- S15 P. G. A. Aronica, S. J. Fox and C. S. Verma, *ACS Omega* 2018, **3**, 4664-4673.
- S16 P. Larsson, R. C. Kneiszl and E. G. Marklund, *J. Comp. Chem.* 2020, **41**, 1564-1569.
- S17 M. J. Abraham, R. Murtola, R. Schulz, S. Páll, J. C. Smith, B. Hess and E. Lindahl, *SoftwareX* 2015, **1-2**, 19-25.
- S18 K. Lindorff-Larsen, S. Piana, K. Palmo, P. Maragakis, J. L. Klepeis, R. O. Dror and D. E. Shaw, *Proteins Struct. Funct. Bioinforma.* 2010, **78**, 1950-1958.
- S19 H. J. C. Berendsen, J. P. M. Postma, W. F. van Gunsteren, A. DiNola and J. R. Haak, *J. Chem. Phys.* 1984, **81**, 3684-3690.
- S20 M. Parrinello and A. Rahman, *J. Appl. Phys.* 1981, **52**, 7182-7190.
- S21 G. Bussi, D. Donadio and M. Parrinello, *J. Chem. Phys.* 2007, **126**, 014101.
- S22 K. A. Feenstra, B. Hess and J. C. Berendsen, *J. Comput. Chem.* 1999, **20**, 786-798.
- S23 B. Hess, H. Bekker, H. J. C. Berendsen and J. G. E. M. Fraaije, *J. Comput. Chem.* 1997, **18**, 1463-1472.
- S24 U. Essmann, L. Perera, M. L. Berkowitz, T. Darden, H. Lee and L. G. Pedersen, *J. Chem. Phys.* 1995, **103**, 8577-8593.
- S25 X. Daura, K. Gademann, B. Jaun, D. Seebach, W. F. van Gunsteren and A. E. Mark, *Angew. Chemie - Int. Ed.* 1999, **38**, 236-240.
- S26 N. Michaud-Agrawal, E. J. Denning, T. B. Woolf and O. Beckstein, *J. Comput. Chem.* 2011, **32**, 2319-2327.
